# Supplementary material for: Surface Electromyography-Driven Parameters for Representing Muscle Mass and Strength
Source: MDPI journal article supplement (doi:10.3390/s23125490), 2023-06-10
Supplement: s1 [file s1]

**Supplementary Table S1.** Stepwise regression analysis for ASM incorporating upper limb related sEMG variables (Model 1) and lower limb related sEMG variables (Model 2).

**<Model 1>**

| Entered predictor variables | Equation: $ASM = -27.590 + 21.471 \times \text{Height} + 0.172 \times \text{weight} - 2.093 \times (1, \text{ if, female; } 0, \text{ if male}) + 0.361 \times \text{RatioRMS(KF)} + 0.405 \times \text{RatioRMS(KE)}$ |         |                |       |                 |
|-----------------------------|------------------------------------------------------------------------------------------------------------------------------------------------------------------------------------------------------------------------|---------|----------------|-------|-----------------|
|                             |                                                                                                                                                                                                                        | $\beta$ | Standard error | VIF   | <i>P</i> -value |
|                             | Constant                                                                                                                                                                                                               | -27.590 | 3.213          |       |                 |
|                             | Height (m)                                                                                                                                                                                                             | 21.471  | 2.044          | 3.082 | <0.001          |
| Age, sex, height, weight,   | Weight (kg)                                                                                                                                                                                                            | 0.172   | 0.013          | 1.928 | <0.001          |
|                             | Sex (female)                                                                                                                                                                                                           | -2.093  | 0.340          | 2.812 | <0.001          |
| MeanRMS(KF, KE),            | RatioRMS(KF) (mV)                                                                                                                                                                                                      | 0.361   | 0.118          | 1.251 | 0.003           |
| MaxRMS(KF, KE),             | RatioRMS(KE) (mV)                                                                                                                                                                                                      | 0.405   | 0.180          | 1.055 | 0.026           |
| RatioRMS(KF, KE)            | R <sup>2</sup>                                                                                                                                                                                                         | 0.936   |                |       |                 |
|                             | Adjusted R <sup>2</sup>                                                                                                                                                                                                | 0.934   |                |       |                 |
|                             | SEE                                                                                                                                                                                                                    | 1.174   |                |       |                 |
|                             | Durbin-Watson statistic                                                                                                                                                                                                | 1.703   |                |       |                 |

**<Model 2>**

| Entered predictor variables | Equation: $ASM = -25.584 + 20.775 \times \text{Height} + 0.174 \times \text{weight} - 2.297 \times (1, \text{ if, female; } 0, \text{ if male}) + 1.109 \times \text{MeanRMS(EE)}$ |         |                |       |                 |
|-----------------------------|------------------------------------------------------------------------------------------------------------------------------------------------------------------------------------|---------|----------------|-------|-----------------|
|                             |                                                                                                                                                                                    | $\beta$ | Standard error | VIF   | <i>P</i> -value |
|                             | Constant                                                                                                                                                                           | -25.584 | 3.230          |       |                 |
|                             | Height (m)                                                                                                                                                                         | 20.775  | 2.103          | 3.144 | <0.001          |
| Age, sex, height, weight,   | Weight (kg)                                                                                                                                                                        | 0.174   | 0.013          | 1.953 | <0.001          |
| MeanRMS(EF, EE),            | Sex (female)                                                                                                                                                                       | -2.297  | 0.336          | 2.651 | <0.001          |
| MaxRMS(EF, EE),             | MeanRMS(EE) (mV)                                                                                                                                                                   | 1.109   | 0.378          | 1.245 | 0.004           |
| RatioRMS(EF, EE)            | R <sup>2</sup>                                                                                                                                                                     | 0.933   |                |       |                 |
|                             | Adjusted R <sup>2</sup>                                                                                                                                                            | 0.931   |                |       |                 |
|                             | SEE                                                                                                                                                                                | 1.196   |                |       |                 |
|                             | Durbin-Watson statistic                                                                                                                                                            | 1.934   |                |       |                 |

ASM, appendicular skeletal muscle mass; sEMG, surface electromyography; RMS, root mean

square; EF, elbow flexion; EE, elbow extension; KF, knee flexion; KE, knee extension; SEE, standard error of estimate; VIF, variance inflation factor.
